# Supplementary material for: Fabry Disease: Current and Novel Therapeutic Strategies. A Narrative Review
Source: PubMed Central journal article supplement — Curr Neuropharmacol. 2023 Mar 8;21(3):440–56. doi: 10.2174/1570159X20666220601124117 (PMC10207921; doi:10.2174/1570159x20666220601124117), 2023-03-08
Supplement: CN-21-440_SD1.pdf [file CN-21-440_SD1.pdf]

## Supplementary Material

# Fabry Disease: Current and Novel Therapeutic Strategies. A Narrative Review

Lina Palaiodimou<sup>1</sup>, Panagiotis Kokotis<sup>2</sup>, Christina Zompola<sup>1</sup>, Georgia Papagiannopoulou<sup>1</sup>, Eleni Bakola<sup>1</sup>, Marianna Papadopoulou<sup>1</sup>, Vasiliki Zouvelou<sup>2</sup>, Dimitrios Petras<sup>3</sup>, Charalampos Vlachopoulos<sup>4</sup> and Georgios Tsivgoulis<sup>1,5,\*</sup>

<sup>1</sup>Second Department of Neurology, "Attikon" University Hospital, School of Medicine, National and Kapodistrian University of Athens, Athens, Greece; <sup>2</sup>First Department of Neurology, National and Kapodistrian University of Athens, School of Medicine, Eginition Hospital, Athens, Greece; <sup>3</sup>Nephrology Department, Hippokration General Hospital, Athens, Greece; <sup>4</sup>First Department of Cardiology, Hippokration Hospital, University of Athens, Athens, Greece; <sup>5</sup>Department of Neurology, University of Tennessee Health Science Center, Memphis, TN, USA

## Narrative Review Reporting Checklist

| Section/topic             | # | Checklist item                                                                                                                                                                                        | Reported on page # |
|---------------------------|---|-------------------------------------------------------------------------------------------------------------------------------------------------------------------------------------------------------|--------------------|
| <b>TITLE</b>              |   |                                                                                                                                                                                                       |                    |
| Title                     | 1 | Identify the report as a Narrative Review                                                                                                                                                             | 1                  |
| <b>ABSTRACT</b>           |   |                                                                                                                                                                                                       |                    |
| Unstructured summary      | 2 | Provide an unstructured summary including, as applicable: background, objective, brief summary of narrative review and implications for future research, and clinical practice or policy development. | 4-5                |
| <b>INTRODUCTION</b>       |   |                                                                                                                                                                                                       |                    |
| Rationale/background      | 3 | Describe the rationale for the review in the context of what is already known.                                                                                                                        | 6                  |
| Objectives                | 4 | Specify the key question(s) identified for the review topic.                                                                                                                                          | 7                  |
| <b>METHODS</b>            |   |                                                                                                                                                                                                       |                    |
| Research selection        | 5 | Specify the process for identifying the literature search (eg, years considered, language, publication status, studydesign, and databases of coverage).                                               | 7-8                |
| <b>DISCUSSION/SUMMARY</b> |   |                                                                                                                                                                                                       |                    |
| Narrative                 | 6 | Discuss: 1) research reviewed including fundamental or key findings, 2) limitations and/or quality of researchreviewed, and 3) need for future research.                                              | 22-23              |
| Summary                   | 7 | Provide an overall interpretation of the narrative review in the context of clinical practice, policy development and implementation, or future research.                                             | 23                 |
